# Supplementary material for: Targeted Spontaneous Reporting of Suspected Renal Toxicity in Patients Undergoing Highly Active Anti-Retroviral Therapy in Two Public Health Facilities in Uganda
Source: Springer Nature journal article supplement (doi:10.1007/s40264-015-0277-9), 2015-03-06
Supplement: MOESM1 [file 24117274]

## Electronic Supplementary Material No.1

DRUG SAFETY JOURNAL

### **Targeted Spontaneous Reporting of suspected renal toxicity in patients undergoing Highly Active Anti-Retroviral Therapy in two public health facilities in Uganda.**

Helen Ndagije<sup>1</sup>, Victoria Nambasa<sup>1</sup>, Elizabeth Namagala<sup>2</sup>, Huldah Nassali<sup>1</sup>, Dan Kajungu<sup>3</sup>, Gordon Sematiko<sup>1</sup>, Sten Olsson<sup>4</sup>, Shanthi Pal<sup>5</sup>

<sup>1</sup>National Pharmacovigilance Centre, National Drug Authority, Kampala Uganda

<sup>2</sup>STD/AIDS Control Program, Ministry of Health, Kampala Uganda

<sup>3</sup>Institute of Health and Society (IRSS), Universite Catholique de Louvain, Brussels, Belgium

<sup>4</sup>World Health Organisation Collaborating Centre for International Drug Monitoring, Uppsala, Sweden

<sup>5</sup>World Health Organisation

Corresponding Author: Helen Byomire Ndagije, [hbyomire@nda.or.ug](mailto:hbyomire@nda.or.ug)

Figure 1. Job aid for identificatying and reporting suspected renal toxicity related to tenofovir

# TENIFOVIR RENAL TOXICITY ASSESSMENT AID

## 1 HISTORY TAKING

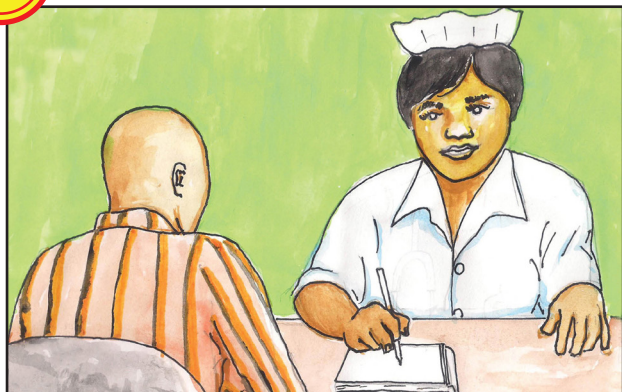

- Review the patient's medical and drug history.
- Probe whether the patient took the medicines correctly (dose and time)
- Ask patient if she/he has any complaints after the last visit
- Remember TDF causes renal tubular dysfunction which is typically asymptomatic. Key measurements of interest are urinalysis (protein & glucose in urine) and Serum creatine
- You may consider late symptoms of renal toxicity (fatigue, weakness, frequent urination, increased thirst, edema)

## 2 INVESTIGATIONS

- For patients initiating Tenofovir, consider baseline tests for glucosuria, proteinuria, plasma urea, serum creatinin.
- For patients continuing with Tenofovir consider carrying out urinalysis every three months in the first year of therapy and then subsequently on a twice yearly basis or as per the national guideline for monitoring Tenofovir toxicity.

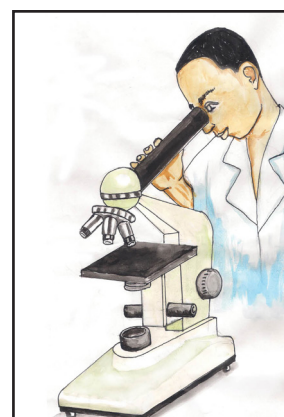

## 3 ASSESSMENT OF EVENT

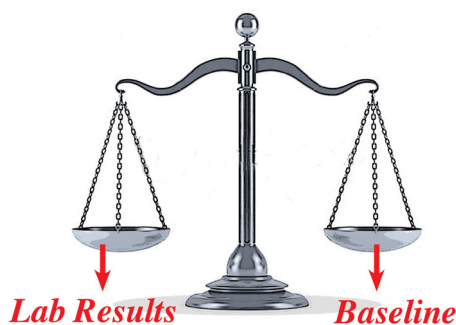

- If laboratory tests were done, compare results with baseline.
- Determine the time between taking the medicine and onset/detection of reaction.
- Rule out any other possible cause of abnormal tests or complaints.

## 4 MAKE THE DIAGNOSIS

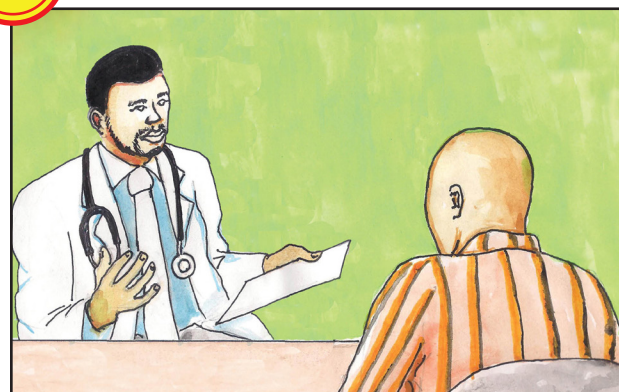

- From your assessment, make a diagnosis for the event whether medicine related or other causes.
- Clinically manage the patient.

## 5 REPORT THE SUSPECTED ADVERSE DRUG REACTION

- Fill in the adverse reaction form.
- Send the filled form to the Pharmacovigilance Coordinator or National Drug Authority Plot 46/48 Lumumba Avenue.
