# Supplementary material for: Targeted Spontaneous Reporting of Suspected Renal Toxicity in Patients Undergoing Highly Active Anti-Retroviral Therapy in Two Public Health Facilities in Uganda
Source: Springer Nature journal article supplement (doi:10.1007/s40264-015-0277-9), 2015-03-06
Supplement: MOESM2 [file 24117274]

## Electronic Supplementary Material No.2

DRUG SAFETY JOURNAL

### **Targeted Spontaneous Reporting of suspected renal toxicity in patients undergoing Highly Active Anti-Retroviral Therapy in two public health facilities in Uganda.**

Helen Ndagije<sup>1</sup>, Victoria Nambasa<sup>1</sup>, Elizabeth Namagala<sup>2</sup>, Huldah Nassali<sup>1</sup>, Dan Kajungu<sup>3</sup>, Gordon Sematiko<sup>1</sup>, Sten Olsson<sup>4</sup>, Shanthi Pal<sup>5</sup>

<sup>1</sup>National Pharmacovigilance Centre, National Drug Authority, Kampala Uganda

<sup>2</sup>STD/AIDS Control Program, Ministry of Health, Kampala Uganda

<sup>3</sup>Institute of Health and Society (IRSS), Universite Catholique de Louvain, Brussels, Belgium

<sup>4</sup>World Health Organisation Collaborating Centre for International Drug Monitoring, Uppsala, Sweden

<sup>5</sup>World Health Organisation

Corresponding Author: Helen Byomire Ndagije, [hbyomire@nda.or.ug](mailto:hbyomire@nda.or.ug)

Figure 1. Suspected adverse drug reaction reporting form

## *Guidance on reporting*

|                                                                                                                                                                                                                                                                                                                                                                                                                                                                                                                                                                                                                                                                                                                                                                                                                                                                                                                                                                                                                                                                                                                                                                                                                                                                                                                                                                                                                                                                                                                                                                                                                                                                                                                                                                                                                                                                                                                     |                                                                                                                                                                                                                                                                                                                                                                                                                                                                                                                                                                                                                                                                                                                                                                                                                                                                                                                                                                                                                                                                                                                                                                                                                                                                                                                                                                                                                                                                                                                                                                                                                           |
|---------------------------------------------------------------------------------------------------------------------------------------------------------------------------------------------------------------------------------------------------------------------------------------------------------------------------------------------------------------------------------------------------------------------------------------------------------------------------------------------------------------------------------------------------------------------------------------------------------------------------------------------------------------------------------------------------------------------------------------------------------------------------------------------------------------------------------------------------------------------------------------------------------------------------------------------------------------------------------------------------------------------------------------------------------------------------------------------------------------------------------------------------------------------------------------------------------------------------------------------------------------------------------------------------------------------------------------------------------------------------------------------------------------------------------------------------------------------------------------------------------------------------------------------------------------------------------------------------------------------------------------------------------------------------------------------------------------------------------------------------------------------------------------------------------------------------------------------------------------------------------------------------------------------|---------------------------------------------------------------------------------------------------------------------------------------------------------------------------------------------------------------------------------------------------------------------------------------------------------------------------------------------------------------------------------------------------------------------------------------------------------------------------------------------------------------------------------------------------------------------------------------------------------------------------------------------------------------------------------------------------------------------------------------------------------------------------------------------------------------------------------------------------------------------------------------------------------------------------------------------------------------------------------------------------------------------------------------------------------------------------------------------------------------------------------------------------------------------------------------------------------------------------------------------------------------------------------------------------------------------------------------------------------------------------------------------------------------------------------------------------------------------------------------------------------------------------------------------------------------------------------------------------------------------------|
| <p><b>What to report</b></p> <p>Report all suspected adverse drug reactions/events both serious and those that are not serious. Report any adverse reaction even if you are not certain the product caused the vent. A reaction is serious when the patient outcome:</p> <ul style="list-style-type: none"><li>• <i>Is fatal</i></li><li>• <i>Is life-threatening</i></li><li>• <i>Is permanently/Significantly disabling</i></li><li>• <i>Requires or prolongs hospitalization</i></li><li>• <i>Causes a congenital anomaly</i></li><li>• <i>Requires intervention to prevent permanent impairment or damage</i></li></ul> <p>For reports on product quality, report complaints such as;</p> <ul style="list-style-type: none"><li>• Questionable stability</li><li>• Poor packaging or labeling</li><li>• Expired drugs</li><li>• Suspected contamination</li><li>• Defective components</li><li>• Therapeutic failures</li></ul> <p><b>When to report</b></p> <p>Report the event soon after it occurs.</p> <p><b>Who is to report</b></p> <ul style="list-style-type: none"><li>• All Healthcare Providers e.g. Doctors, Dentists, Pharmacists, Midwives, Nurses and Allied Health Professionals in Uganda should report as part of their professional responsibility report any suspected adverse drug reactions.</li></ul> <p><b>Whre to report</b></p> <ul style="list-style-type: none"><li>• Reports should be sent to the National Pharmacovigilance Centre at the National Drug Authority Secretariat.</li><li>• Reports can also be sent to the Regional Centres in Regional Referral Hospitals.</li><li>• NDA Regional offices.</li></ul> <p><b>How to report</b></p> <ul style="list-style-type: none"><li>• Fill in the sections that apply to your report.</li><li>• State date of administration for the suspected drug and the date when the suspected reaction occurred are mandatory.</li></ul> | <p><b>Detection of Adverse Drug Reactions in a Patient</b></p> <p>Follow the steps below;</p> <ul style="list-style-type: none"><li>• Take proper history and conduct proper examination of the patient.</li><li>• Ensure that the medicine ordered is the medicine recieved and actually taken by the patient at the dose advised.</li><li>• Verify that the onset of the suspected ADR was after the drug was taken, not before and discuss carefully the observation made by the patient.</li><li>• Determine the time interval between the beginning of drug treatment and the onset of the event.</li><li>• Evaluate the suspected ADR after discontinuing drugs or reducing the dose and monitor the patient's status (De-challenge). If appropriate, restart the drug treatment and monitor recurrence of any adverse events (Re-challenge).</li><li>• Analyse the alternative causes (other than the drug) that could on their own have caused the reaction.</li><li>• Use relevant up-to date literature and personal experience and their ADRs and verify if there are previous conclusive reports on this reatcion.</li></ul> <p><b>Please note</b> that submission of a report doesn't imply that the health worker or the product caused or contributed to the adverse event.</p> <p style="text-align: center;"><b>Address:</b><br/><b>Executive Secretary/Registrar</b><br/><b>National Drug Authority</b><br/><b>Plot 66 - 48 Lumumba Avenue</b><br/><b>P.O. box 23096, Kampala</b><br/><b>Tel: 255 665/347 391 - Direct line: 0414-344 052</b><br/><b>E-mail: ndaug@nda.or.ug/druginfo@nda.or.ug</b></p> |
|---------------------------------------------------------------------------------------------------------------------------------------------------------------------------------------------------------------------------------------------------------------------------------------------------------------------------------------------------------------------------------------------------------------------------------------------------------------------------------------------------------------------------------------------------------------------------------------------------------------------------------------------------------------------------------------------------------------------------------------------------------------------------------------------------------------------------------------------------------------------------------------------------------------------------------------------------------------------------------------------------------------------------------------------------------------------------------------------------------------------------------------------------------------------------------------------------------------------------------------------------------------------------------------------------------------------------------------------------------------------------------------------------------------------------------------------------------------------------------------------------------------------------------------------------------------------------------------------------------------------------------------------------------------------------------------------------------------------------------------------------------------------------------------------------------------------------------------------------------------------------------------------------------------------|---------------------------------------------------------------------------------------------------------------------------------------------------------------------------------------------------------------------------------------------------------------------------------------------------------------------------------------------------------------------------------------------------------------------------------------------------------------------------------------------------------------------------------------------------------------------------------------------------------------------------------------------------------------------------------------------------------------------------------------------------------------------------------------------------------------------------------------------------------------------------------------------------------------------------------------------------------------------------------------------------------------------------------------------------------------------------------------------------------------------------------------------------------------------------------------------------------------------------------------------------------------------------------------------------------------------------------------------------------------------------------------------------------------------------------------------------------------------------------------------------------------------------------------------------------------------------------------------------------------------------|

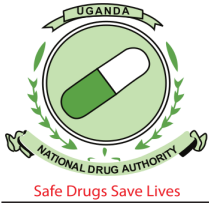

**CONFIDENTIAL**

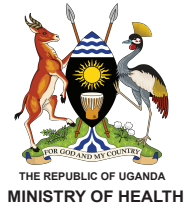

**SUSPECTED ADVERSE DRUG REACTION REPORTING FORM**

| A. PATIENT DETAILS                                                                                                                                                                               |            |                                                              |                              |                                                                                   |                               |                                           |           |
|--------------------------------------------------------------------------------------------------------------------------------------------------------------------------------------------------|------------|--------------------------------------------------------------|------------------------------|-----------------------------------------------------------------------------------|-------------------------------|-------------------------------------------|-----------|
| Patient Name(s)                                                                                                                                                                                  |            |                                                              |                              |                                                                                   |                               | Sex: M/F*                                 |           |
| Age at time of onset(yrs)*                                                                                                                                                                       |            |                                                              | Health Facility              |                                                                                   |                               | Last Menstrual Period                     |           |
| Weight (Kgs)                                                                                                                                                                                     |            |                                                              | District                     |                                                                                   |                               | Trimester (if pregnant)                   |           |
| B. SUSPECTED DRUG(S) DETAILS                                                                                                                                                                     |            |                                                              |                              |                                                                                   |                               |                                           |           |
| Generic Name*                                                                                                                                                                                    | Brand Name | Dose, Route Frequency                                        | Date* started                | Date stopped                                                                      | Prescribed for                | Expiry date                               | Batch No. |
|                                                                                                                                                                                                  |            |                                                              |                              |                                                                                   |                               |                                           |           |
|                                                                                                                                                                                                  |            |                                                              |                              |                                                                                   |                               |                                           |           |
| C. SUSPECTED REACTIONS                                                                                                                                                                           |            |                                                              |                              |                                                                                   |                               |                                           |           |
| Please describe the reaction as observed and any treatment given to manage the reaction                                                                                                          |            |                                                              |                              |                                                                                   |                               |                                           |           |
|                                                                                                                                                                                                  |            |                                                              |                              |                                                                                   |                               |                                           |           |
| <b>Outcome</b><br>Recovered <input type="checkbox"/> Recovering <input type="checkbox"/> Continuing <input type="checkbox"/> Death Due to Reaction <input type="checkbox"/>                      |            |                                                              |                              |                                                                                   |                               |                                           |           |
| Date Reaction Started*                                                                                                                                                                           |            |                                                              | Date Reaction Stopped        |                                                                                   |                               | Date of Notification                      |           |
| SERIOUSNESS OF THE REACTION                                                                                                                                                                      |            |                                                              |                              |                                                                                   |                               |                                           |           |
| Patient Died <input type="checkbox"/>                                                                                                                                                            |            | Prolonged inpatient Hospitalization <input type="checkbox"/> |                              | Involved Disability <input type="checkbox"/>                                      |                               | Life Threatening <input type="checkbox"/> |           |
| Congenital abnormality <input type="checkbox"/>                                                                                                                                                  |            |                                                              |                              |                                                                                   |                               |                                           |           |
| D. CONCOMITANT DRUGS                                                                                                                                                                             |            |                                                              |                              |                                                                                   |                               |                                           |           |
| Please give information on the drug(s) the patient has been taking together with the suspected drug including those taken for chronic diseases (include self medication and herbal preparations) |            |                                                              |                              |                                                                                   |                               |                                           |           |
| Generic                                                                                                                                                                                          | Name Brand | Dosage                                                       | Date started                 | Date stopped                                                                      | Indication (prescribe or OTC) |                                           |           |
|                                                                                                                                                                                                  |            |                                                              |                              |                                                                                   |                               |                                           |           |
| Relevant laboratory tests including dates                                                                                                                                                        |            |                                                              |                              | Additional relevant information (medical history, allergies, failure of efficacy) |                               |                                           |           |
|                                                                                                                                                                                                  |            |                                                              |                              |                                                                                   |                               |                                           |           |
| E. REPORTER'S DETAILS                                                                                                                                                                            |            |                                                              |                              |                                                                                   |                               |                                           |           |
| Name*                                                                                                                                                                                            |            |                                                              | Telephone and E-mail Address |                                                                                   | Date of reporting             | Designation                               |           |
|                                                                                                                                                                                                  |            |                                                              |                              |                                                                                   |                               |                                           |           |

\*Mandatory Field
